# Supplementary material for: Interfacial adsorption of lipopeptidesurfactants at the silica/water interface studied by neutron reflection
Source: Royal Society of Chemistry journal article supplement (doi:10.1039/c0sm00581a), 2010-12-21
Supplement: c0sm00581a.pdf [file c0sm00581a.pdf]

## Support Information

Manuscript ID SM-ART-06-2010-000581 entitled "Interfacial adsorption of lipopeptide surfactants at the silica/water interface studied by neutron reflection"

The titration of pH of  $C_{14}K_1$  solution as a function of volume of NaOH revealed an inflexion point around pH 10.3-10.5, indicating the pKa for the lipopeptide surfactant.

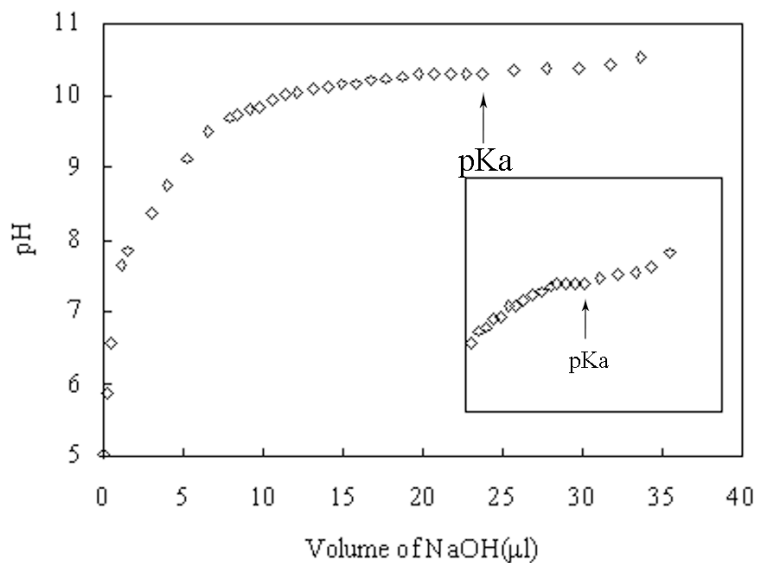

Fig 1SI The pH titration of  $C_{14}K_1$  as a function of volume of NaOH. The inset diagram shows the kink more clearly. pKa = 10.3-10.5
